# Supplementary material
Source: PubMed Central journal article supplement (PMC6842695)

Supplemental Figure 2

**A** IL-6 and Kynurenine

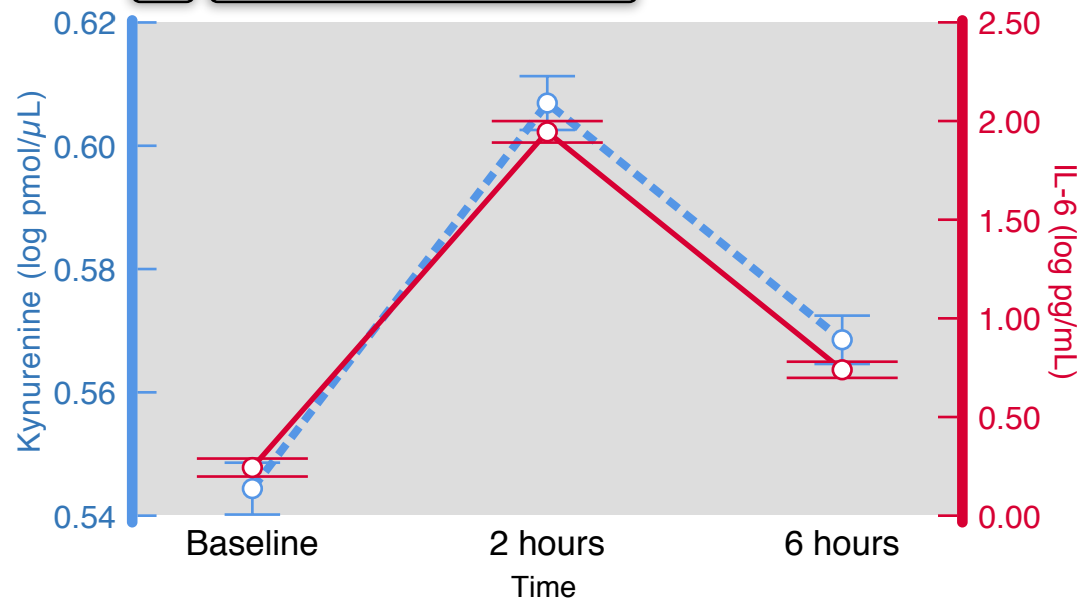

**B** IL-6 and Tryptophan

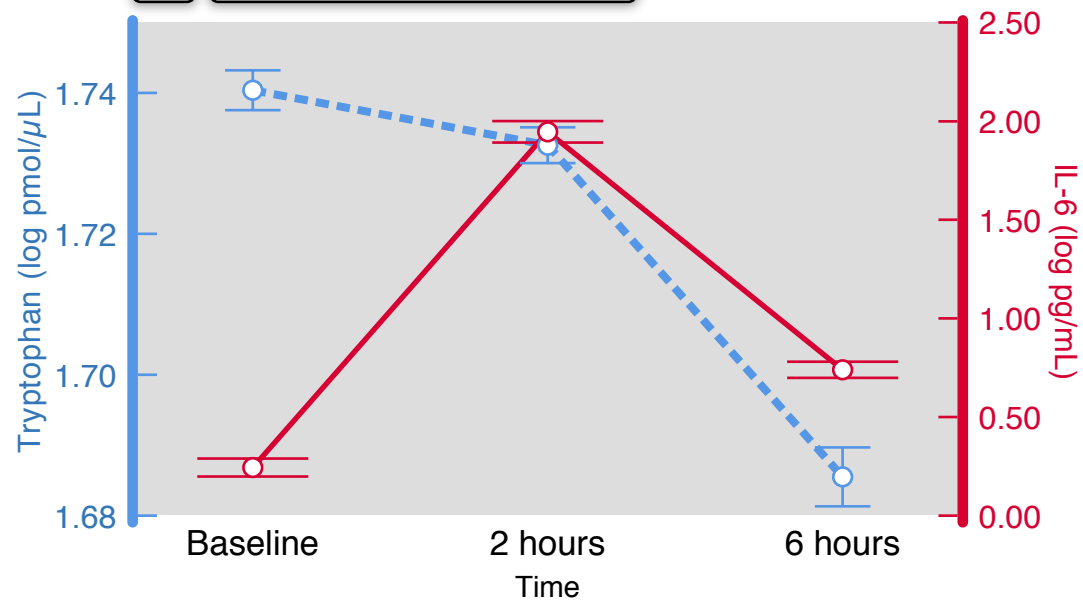

**C** IL-6 and Kynurenic Acid

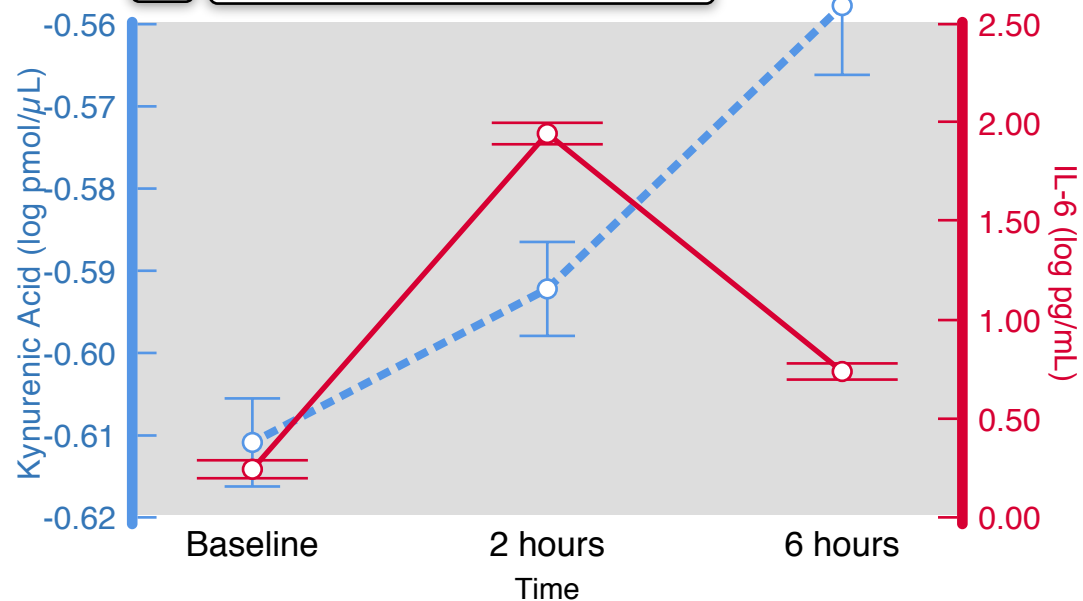

**D** IL-6 and TNF-α

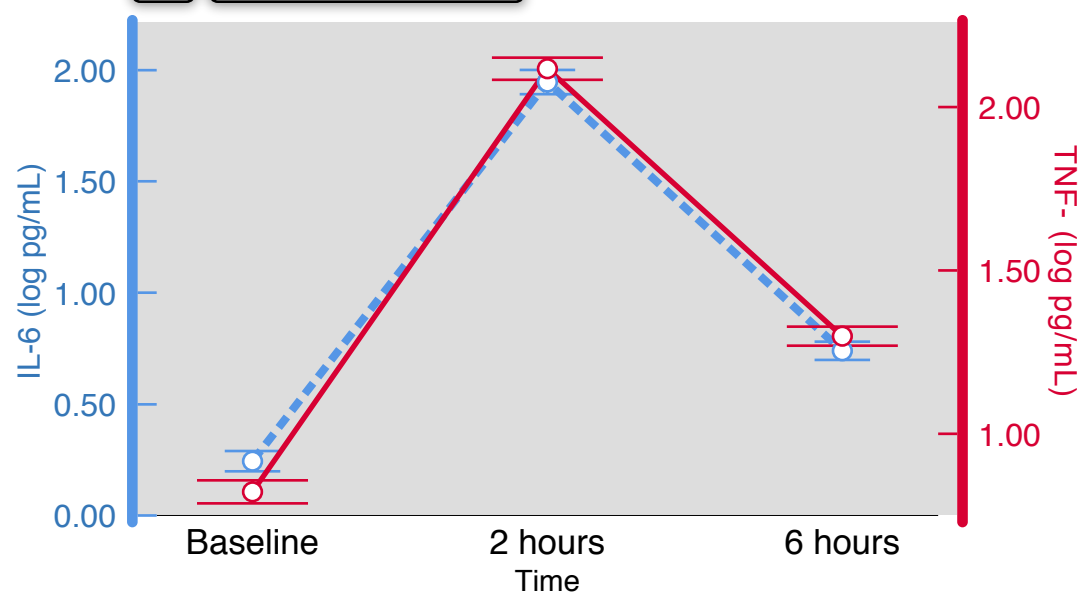

Supplement: NIHMS1535520-supplement-2.pdf [file NIHMS1535520-supplement-2.pdf]
